# Supplementary material
Source: HighWire-hosted journal article supplement (https://erj.ersjournals.com/content/52/3/1800359)
Supplement: inline-supplementary-material-1 [file inline-supplementary-material-1.pdf]

ONLINE SUPPLEMENT

| <b>Lung diseases</b>                         | <b>ICD-10 codes</b>                             |
|----------------------------------------------|-------------------------------------------------|
| Community-acquired pneumonia                 | J10, J11, J12, J13, J14, J15, J16, J17, and J18 |
| Pneumocystis pneumonia                       | B206 and B59                                    |
| Lung tuberculosis                            | A15, A16 and A19                                |
| Legionella pneumonia                         | A481                                            |
| Aspergillosis pneumonia                      | B44.0 and B44.1                                 |
| Pleural empyema                              | J86                                             |
| Lung abscess                                 | J85                                             |
| Cytomegalovirus pneumonia                    | B250                                            |
| Pneumothorax                                 | J93                                             |
| Chronic respiratory failure                  | J961                                            |
| Lung cancer                                  | C34 and C45                                     |
| Pulmonary arterial hypertension (PAH)        | I270                                            |
| Sleep apnea                                  | G473                                            |
| Chronic obstructive pulmonary disease (COPD) | J40, J41, J42 and J44                           |
| Emphysema                                    | J43 and J982                                    |
| Asthma                                       | J45 and J46                                     |
| Pulmonary sarcoidosis                        | D86                                             |
| Lung fibrosis                                | J841                                            |
| Drug-induced pneumonia                       | J702 and J703                                   |
| Pulmonary embolism                           | I26                                             |

Online supplement 1: Lung disease and respective ICD-10 codes identified in main or related diagnosis

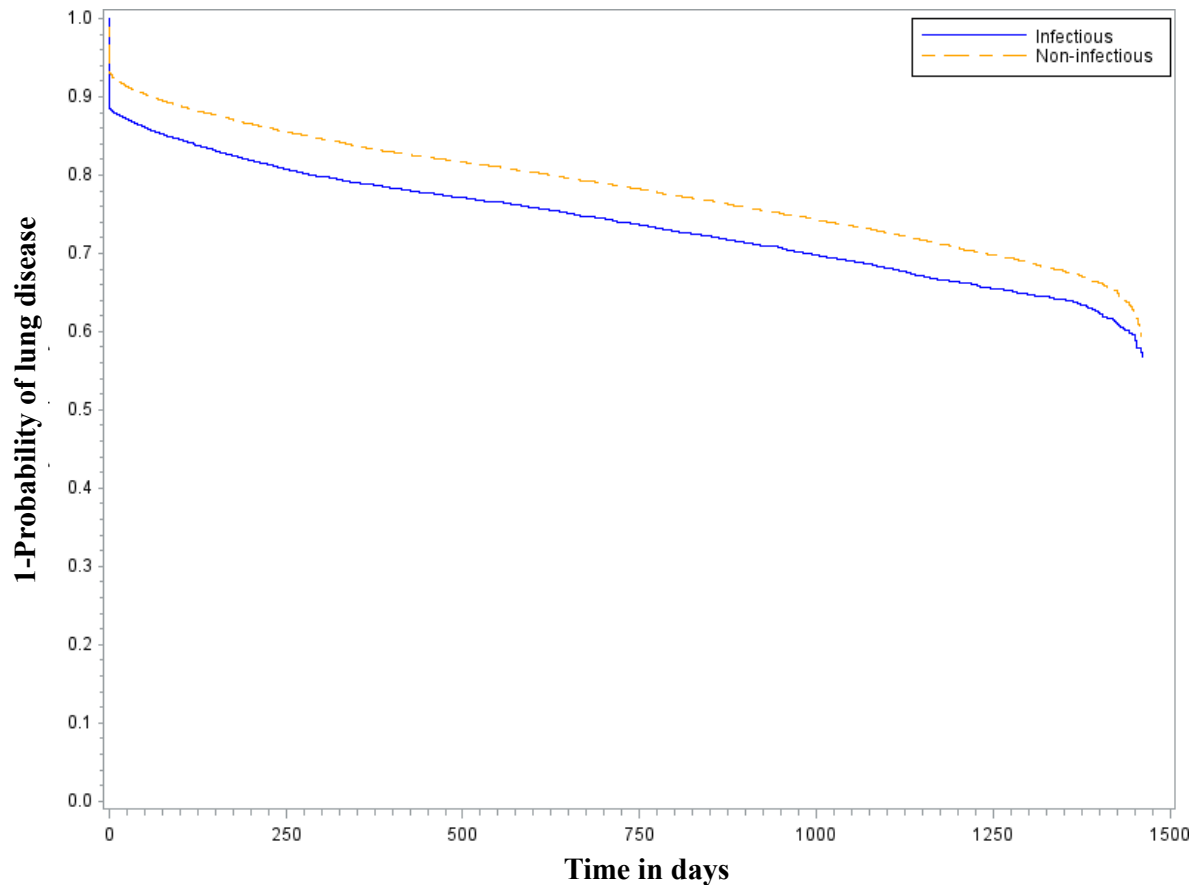

Online supplement 2: Survival curve over time of 2010 prevalent hospitalized PLHIV with lung disease

| Hazard ratios in PLHIV                   |               |                 |               |               |
|------------------------------------------|---------------|-----------------|---------------|---------------|
| Gender                                   | Female        |                 | Male          |               |
| HIV infection                            | Without AIDS  | With AIDS       | Without AIDS  | With AIDS     |
| At least one lung disease                | 1.5 (1.4-1.7) | 3.8 (3.4-4.2)   | 1.3 (1.2-1.4) | 2.8 (2.6-3.0) |
| At least one infectious lung disease     | 3.1 (2.7-3.6) | 10.5 (9.4-11.8) | 2.0 (1.8-2.2) | 5.8 (5.3-6.2) |
| At least one non-infectious lung disease | 1.2 (1.1-1.4) | 2.0 (1.8-2.3)   |               | 1.8 (1.6-1.9) |
| COPD                                     | 1.4 (1.2-1.8) | 2.0 (1.6-2.5)   |               | 1.3 (1.1-1.5) |
| Emphysema                                | 2.3 (1.5-3.5) | 3.1 (2.0-4.8)   | 2.1 (1.7-2.6) | 2.5 (2.1-3.1) |
| Chronic respiratory failure              | 1.8 (1.4-2.4) | 2.5 (1.8-3.4)   |               | 1.6 (1.4-2.0) |
| Lung fibrosis                            |               | 3.4 (1.6-7.2)   |               | 3.5 (2.3-5.8) |
| PAH*                                     | 3.8 (2.6-5.8) | 3.1 (1.8-5.4)   | 2.0 (1.4-2.8) | 2.1 (1.4-3.1) |
| Lung cancer                              |               | 2.0 (1.3-3.2)   |               | 1.7 (1.4-2.1) |
| Sleep apnea**                            |               | 0.6 (0.3-0.9)   | 0.5 (0.4-0.6) | 0.3 (0.2-0.4) |

\* after adjusting for COPD and left heart dysfunction

\*\* after adjusting for obesity

Online supplement 3: Incident analysis over time for 2010 prevalent hospitalized HIV-AIDS to identify the effect of PLHIV with AIDS on lung disease, according to gender (after adjusting for age, and HBV or HBC infection) (Only statistically significant HRs are reported)

| Hazard ratio in PLHIV with AIDS          |                  |                  |                 |                |
|------------------------------------------|------------------|------------------|-----------------|----------------|
| Age (in years)                           | 18-29            | 30-49            | 50-69           | over 70        |
| At least one lung disease                | 9.1 (6.1-13.6)   | 7.2 (6.2-8.4)    | 5.2 (4.2-6.5)   | 5.7 (3.6-9.1)  |
| At least one infectious lung disease     | 25.3 (16.1-40.0) | 17.8 (14.9-21.2) | 12.3 (9.6-15.9) | 8.5 (4.7-15.3) |
| At least one non-infectious lung disease | 2.7 (1.3-5.7)    | 2.6 (2.0-3.3)    | 2.0 (1.4-2.7)   | 2.4 (1.0-5.6)  |

Online supplement 4: Incident analysis over time for 2010 incident hospitalized HIV-AIDS to identify the effect of PLHIV with AIDS on lung disease, according to age group (after adjusting for gender, and HBV or HBC infection) (Only statistically significant HRs are reported)

| Hazard ratio in smoker PLHIV without AIDS |                |               |               |         |
|-------------------------------------------|----------------|---------------|---------------|---------|
| Age (in years)                            | 18-29          | 30-49         | 50-69         | over 70 |
| At least one lung disease                 |                | 1.2 (1.1-1.4) |               |         |
| At least one infectious lung disease      | 4.0 (1.5-11.1) | 1.8 (1.5-2.3) | 1.3 (1.0-1.6) |         |
| At least one non-infectious lung disease  |                | 1.5 (1.2-1.8) |               |         |
| COPD                                      |                |               |               |         |
| Emphysema                                 |                | 1.6 (1.1-2.5) | 1.5 (1.1-2.3) |         |
| Chronic respiratory failure               |                | 1.6 (1.1-2.4) |               |         |
| Lung fibrosis                             |                |               |               |         |
| PAH                                       |                |               |               |         |
| Lung cancer                               |                |               |               |         |
| Sleep apnea                               |                |               | 0.4 (0.2-0.8) |         |

Online supplement 5: Incident analysis over time on smokers to identify the effect of PLHIV without AIDS on lung diseases, according to age group (after adjusting for gender, and HBV or HBC infection) (Only statistically significant HRs are reported)

| Hazard ratio in smoker PLHIV with AIDS   |                |                |               |         |
|------------------------------------------|----------------|----------------|---------------|---------|
| Age (in years)                           | 18-29          | 30-49          | 50-69         | over 70 |
| At least one lung disease                |                | 1.7 (1.5-2.0)  |               |         |
| At least one infectious lung disease     | 3.7 (1.2-11.5) | 3.8 (3.2-4.5)  | 2.4 (1.9-3.0) |         |
| At least one non-infectious lung disease |                | 1.5 (1.2-1.8)  |               |         |
| COPD                                     |                |                |               |         |
| Emphysema                                |                | 2.0 (1.4-3.0)  |               |         |
| Chronic respiratory failure              |                | 2.1 (1.5-3.1)  |               |         |
| Lung fibrosis                            |                | 4.9 (2.0-12.4) |               |         |
| PAH                                      |                | 4.2 (2.3-7.5)  |               |         |
| Lung cancer                              |                | 2.2 (1.4-3.4)  |               |         |
| Sleep apnea                              |                | 0.2 (0.1-0.6)  | 0.3 (0.1-0.8) |         |

Online supplement 6: Incident analysis over time on smokers to identify the effect of PLHIV with AIDS on lung diseases, according to the age group (after adjusting for gender, and HBV or HBC infection) (Only statistically significant HRs are reported)
